# Supplementary material for: Portraying the Expression Landscapes of B-Cell Lymphoma-Intuitive Detection of Outlier Samples and of Molecular Subtypes
Source: MDPI journal article supplement (doi:10.3390/biology2041411), 2013-12-02

*mBL*

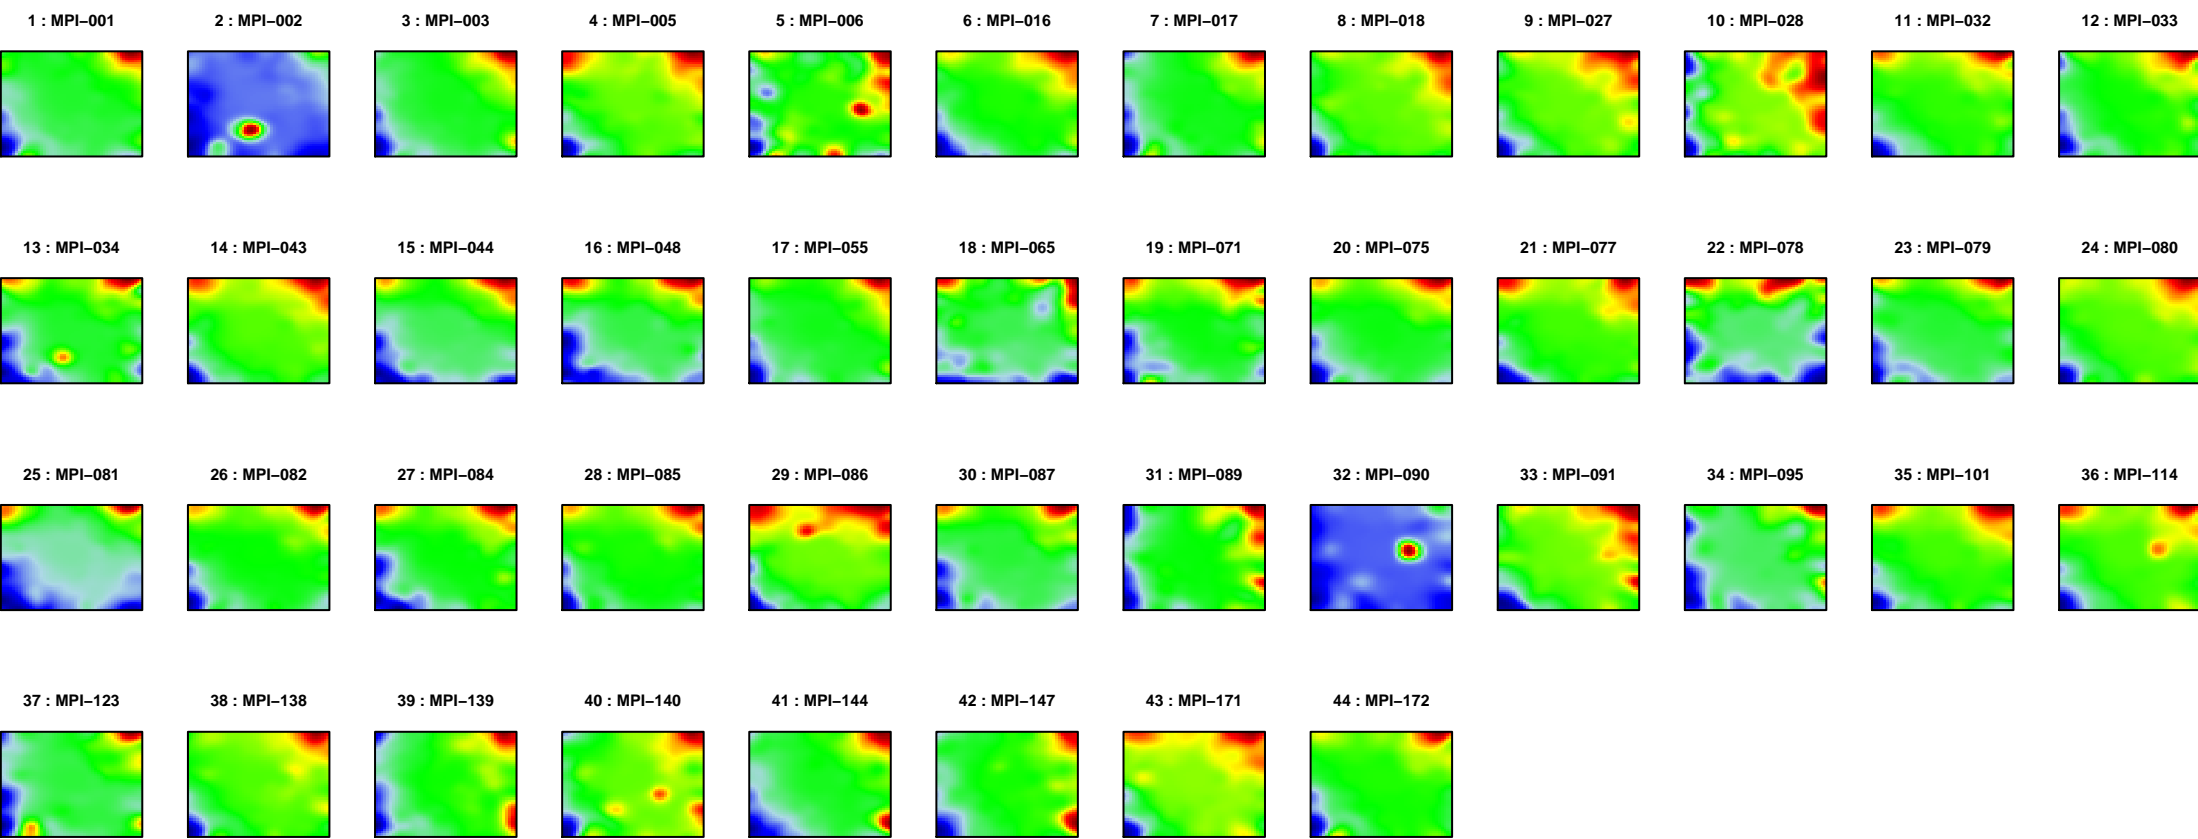

*intermediate*

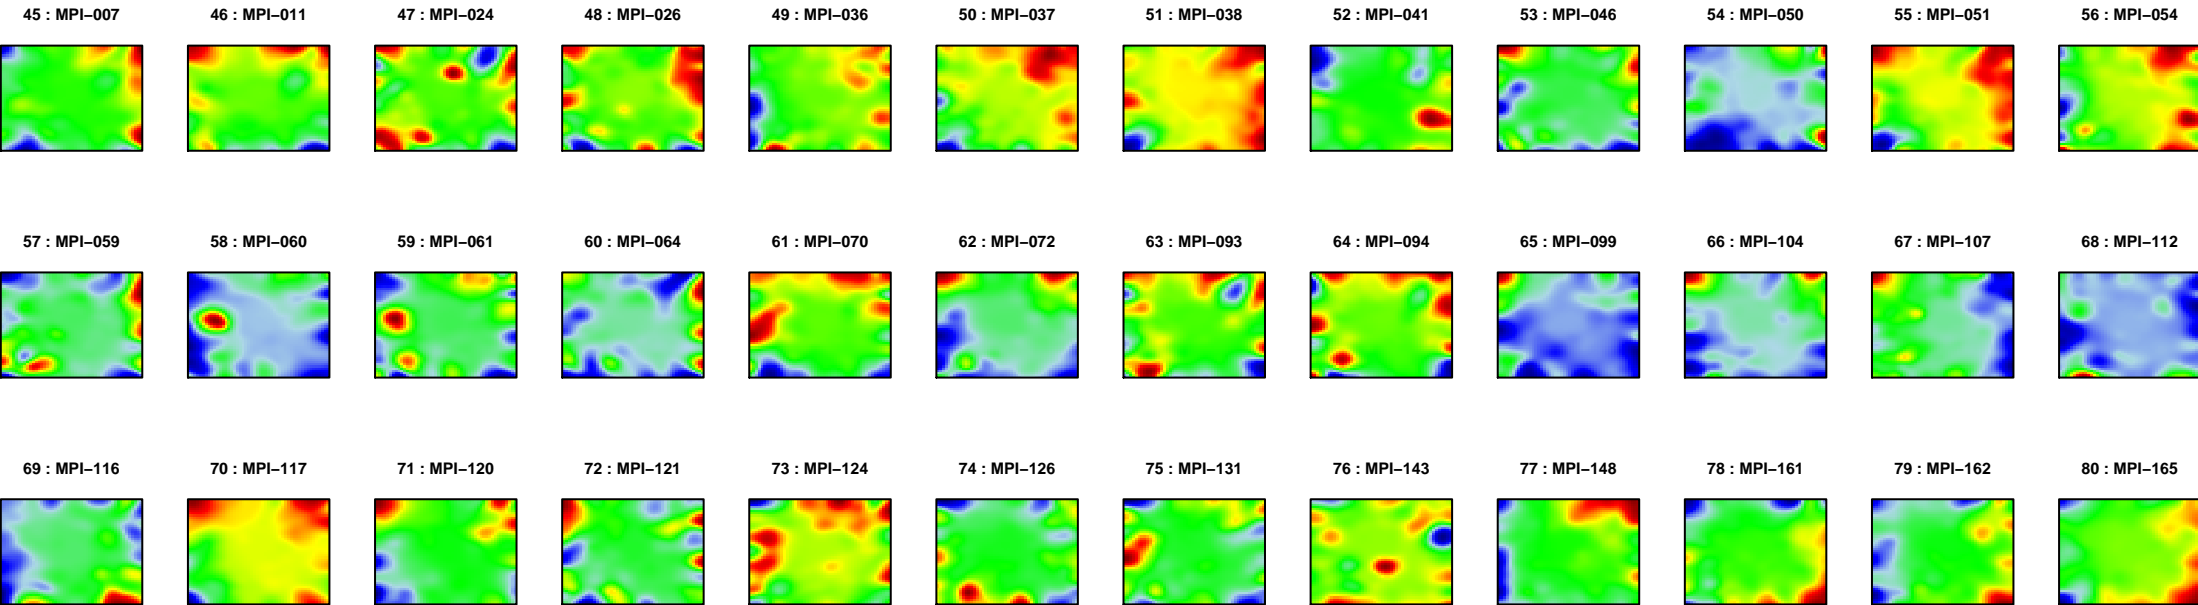

81 : MPI-169

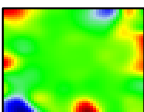

82 : MPI-175

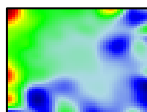

83 : MPI-187

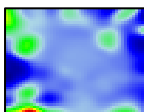

84 : MPI-193

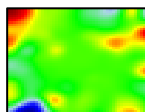

85 : MPI-216

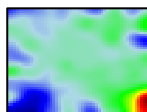

86 : MPI-222

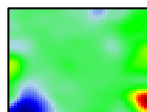

87 : MPI-225

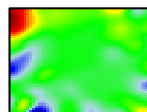

88 : MPI-242

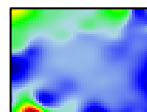

89 : MPI-245

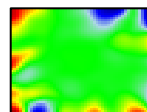

90 : MPI-248

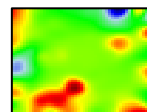

91 : MPI-249

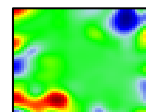

92 : MPI-250

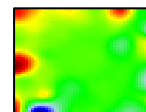*non-mBL*

93 : MPI-008

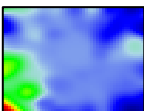

94 : MPI-009

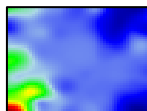

95 : MPI-010

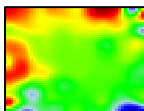

96 : MPI-012

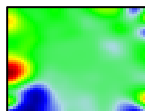

97 : MPI-013

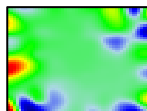

98 : MPI-014

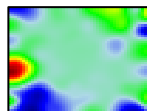

99 : MPI-015

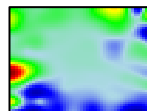

100 : MPI-021

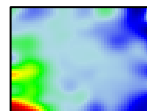

101 : MPI-022

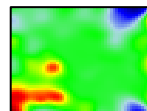

102 : MPI-025

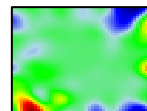

103 : MPI-029

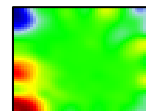

104 : MPI-030

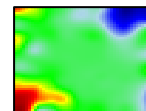

105 : MPI-031

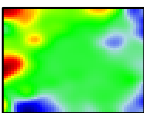

106 : MPI-039

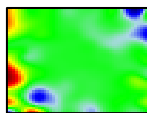

107 : MPI-040

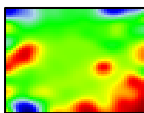

108 : MPI-045

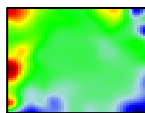

109 : MPI-047

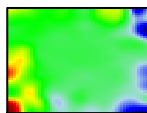

110 : MPI-053

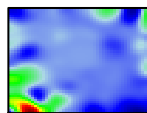

111 : MPI-062

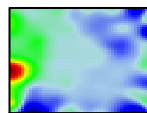

112 : MPI-063

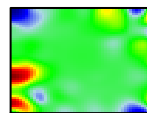

113 : MPI-069

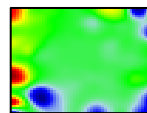

114 : MPI-073

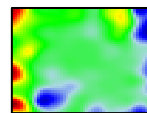

115 : MPI-074

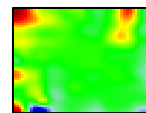

116 : MPI-076

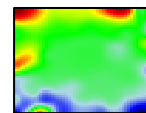

117 : MPI-083

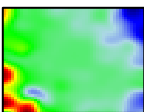

118 : MPI-088

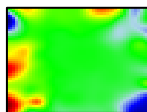

119 : MPI-092

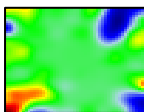

120 : MPI-096

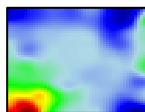

121 : MPI-098

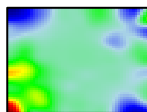

122 : MPI-100

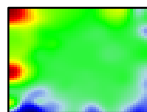

123 : MPI-105

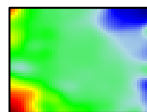

124 : MPI-106

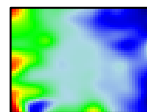

125 : MPI-108

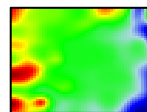

126 : MPI-109

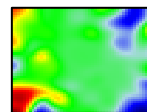

127 : MPI-110

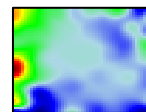

128 : MPI-111

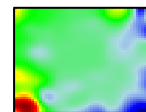

129 : MPI-113

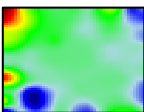

130 : MPI-115

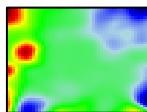

131 : MPI-118

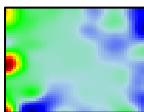

132 : MPI-119

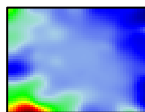

133 : MPI-122

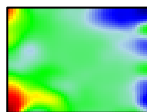

134 : MPI-127

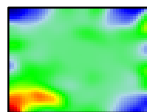

135 : MPI-128

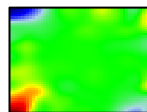

136 : MPI-129

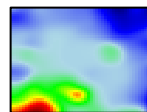

137 : MPI-130

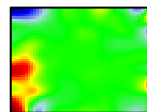

138 : MPI-132

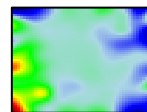

139 : MPI-133

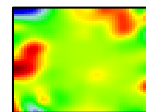

140 : MPI-134

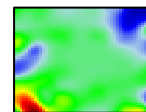

141 : MPI-135

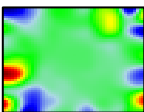

142 : MPI-136

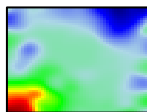

143 : MPI-141

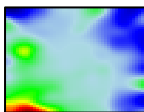

144 : MPI-142

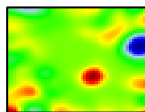

145 : MPI-145

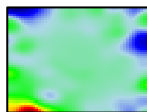

146 : MPI-146

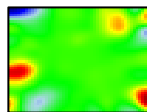

147 : MPI-149

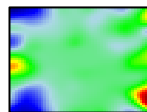

148 : MPI-150

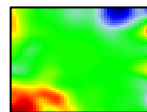

149 : MPI-151

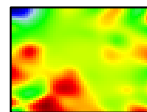

150 : MPI-152

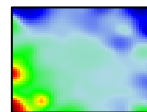

151 : MPI-153

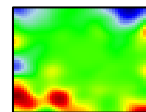

152 : MPI-154

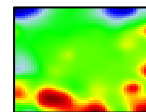

153 : MPI-155

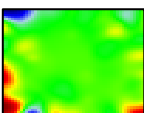

154 : MPI-159

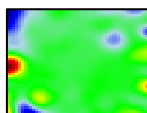

155 : MPI-163

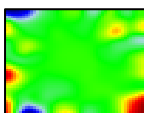

156 : MPI-164

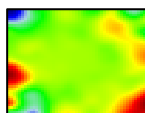

157 : MPI-166

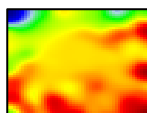

158 : MPI-167

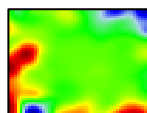

159 : MPI-168

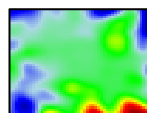

160 : MPI-170

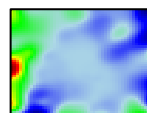

161 : MPI-173

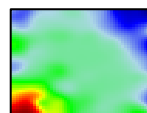

162 : MPI-174

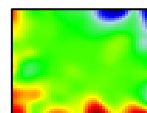

163 : MPI-176

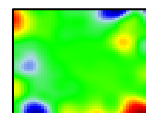

164 : MPI-177

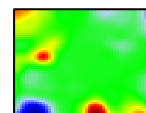

165 : MPI-178

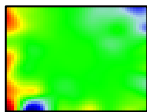

166 : MPI-179

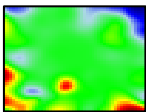

167 : MPI-180

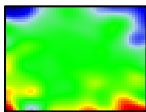

168 : MPI-182

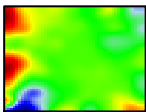

169 : MPI-183

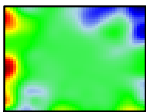

170 : MPI-184

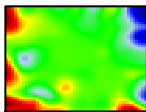

171 : MPI-185

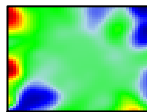

172 : MPI-186

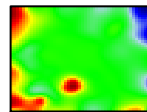

173 : MPI-188

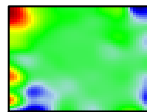

174 : MPI-189

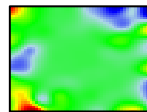

175 : MPI-190

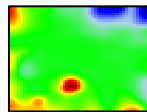

176 : MPI-191

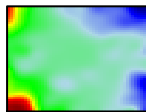

177 : MPI-192

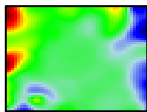

178 : MPI-194

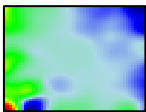

179 : MPI-195

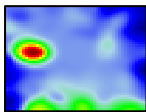

180 : MPI-196

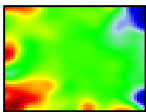

181 : MPI-198

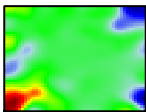

182 : MPI-199

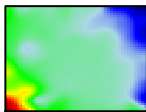

183 : MPI-200

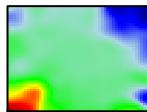

184 : MPI-201

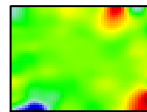

185 : MPI-202

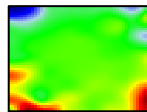

186 : MPI-203

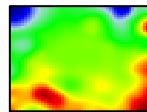

187 : MPI-204

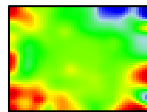

188 : MPI-205

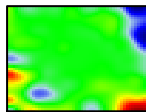

189 : MPI-206

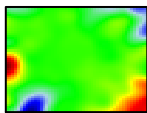

190 : MPI-207

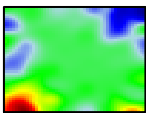

191 : MPI-208

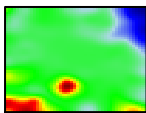

192 : MPI-209

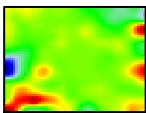

193 : MPI-210

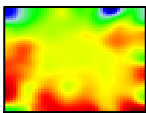

194 : MPI-212

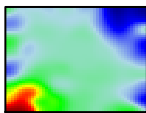

195 : MPI-213

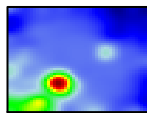

196 : MPI-215

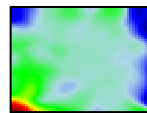

197 : MPI-219

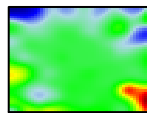

198 : MPI-221

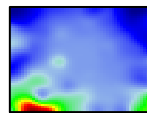

199 : MPI-223a

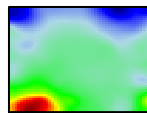

200 : MPI-224

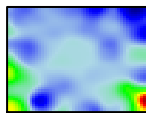

201 : MPI-226

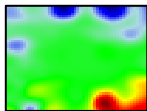

202 : MPI-227

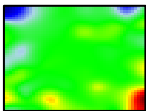

203 : MPI-228

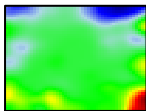

204 : MPI-229

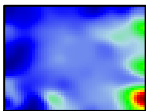

205 : MPI-230

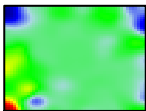

206 : MPI-231

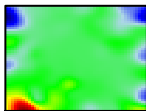

207 : MPI-232

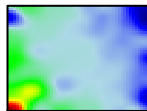

208 : MPI-233

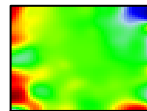

209 : MPI-234

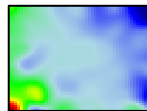

210 : MPI-235

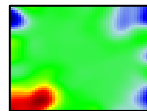

211 : MPI-236

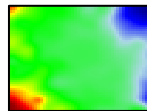

212 : MPI-237

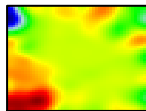

213 : MPI-239

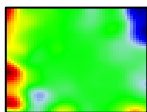

214 : MPI-241

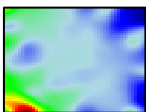

215 : MPI-243

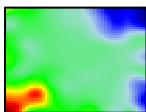

216 : MPI-244

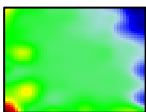

217 : MPI-246

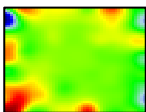

218 : MPI-247

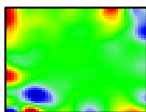

219 : MPI-251

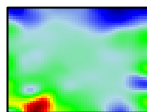

220 : MPI-255

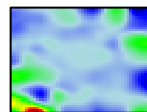

221 : MPI-223b

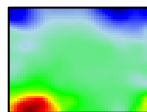

Supplement: s1 [file s1]
