# Supplementary figures and images for: Portraying the Expression Landscapes of B-Cell Lymphoma-Intuitive Detection of Outlier Samples and of Molecular Subtypes
Source: MDPI journal article supplement (doi:10.3390/biology2041411), 2013-12-02

*mBL* \*

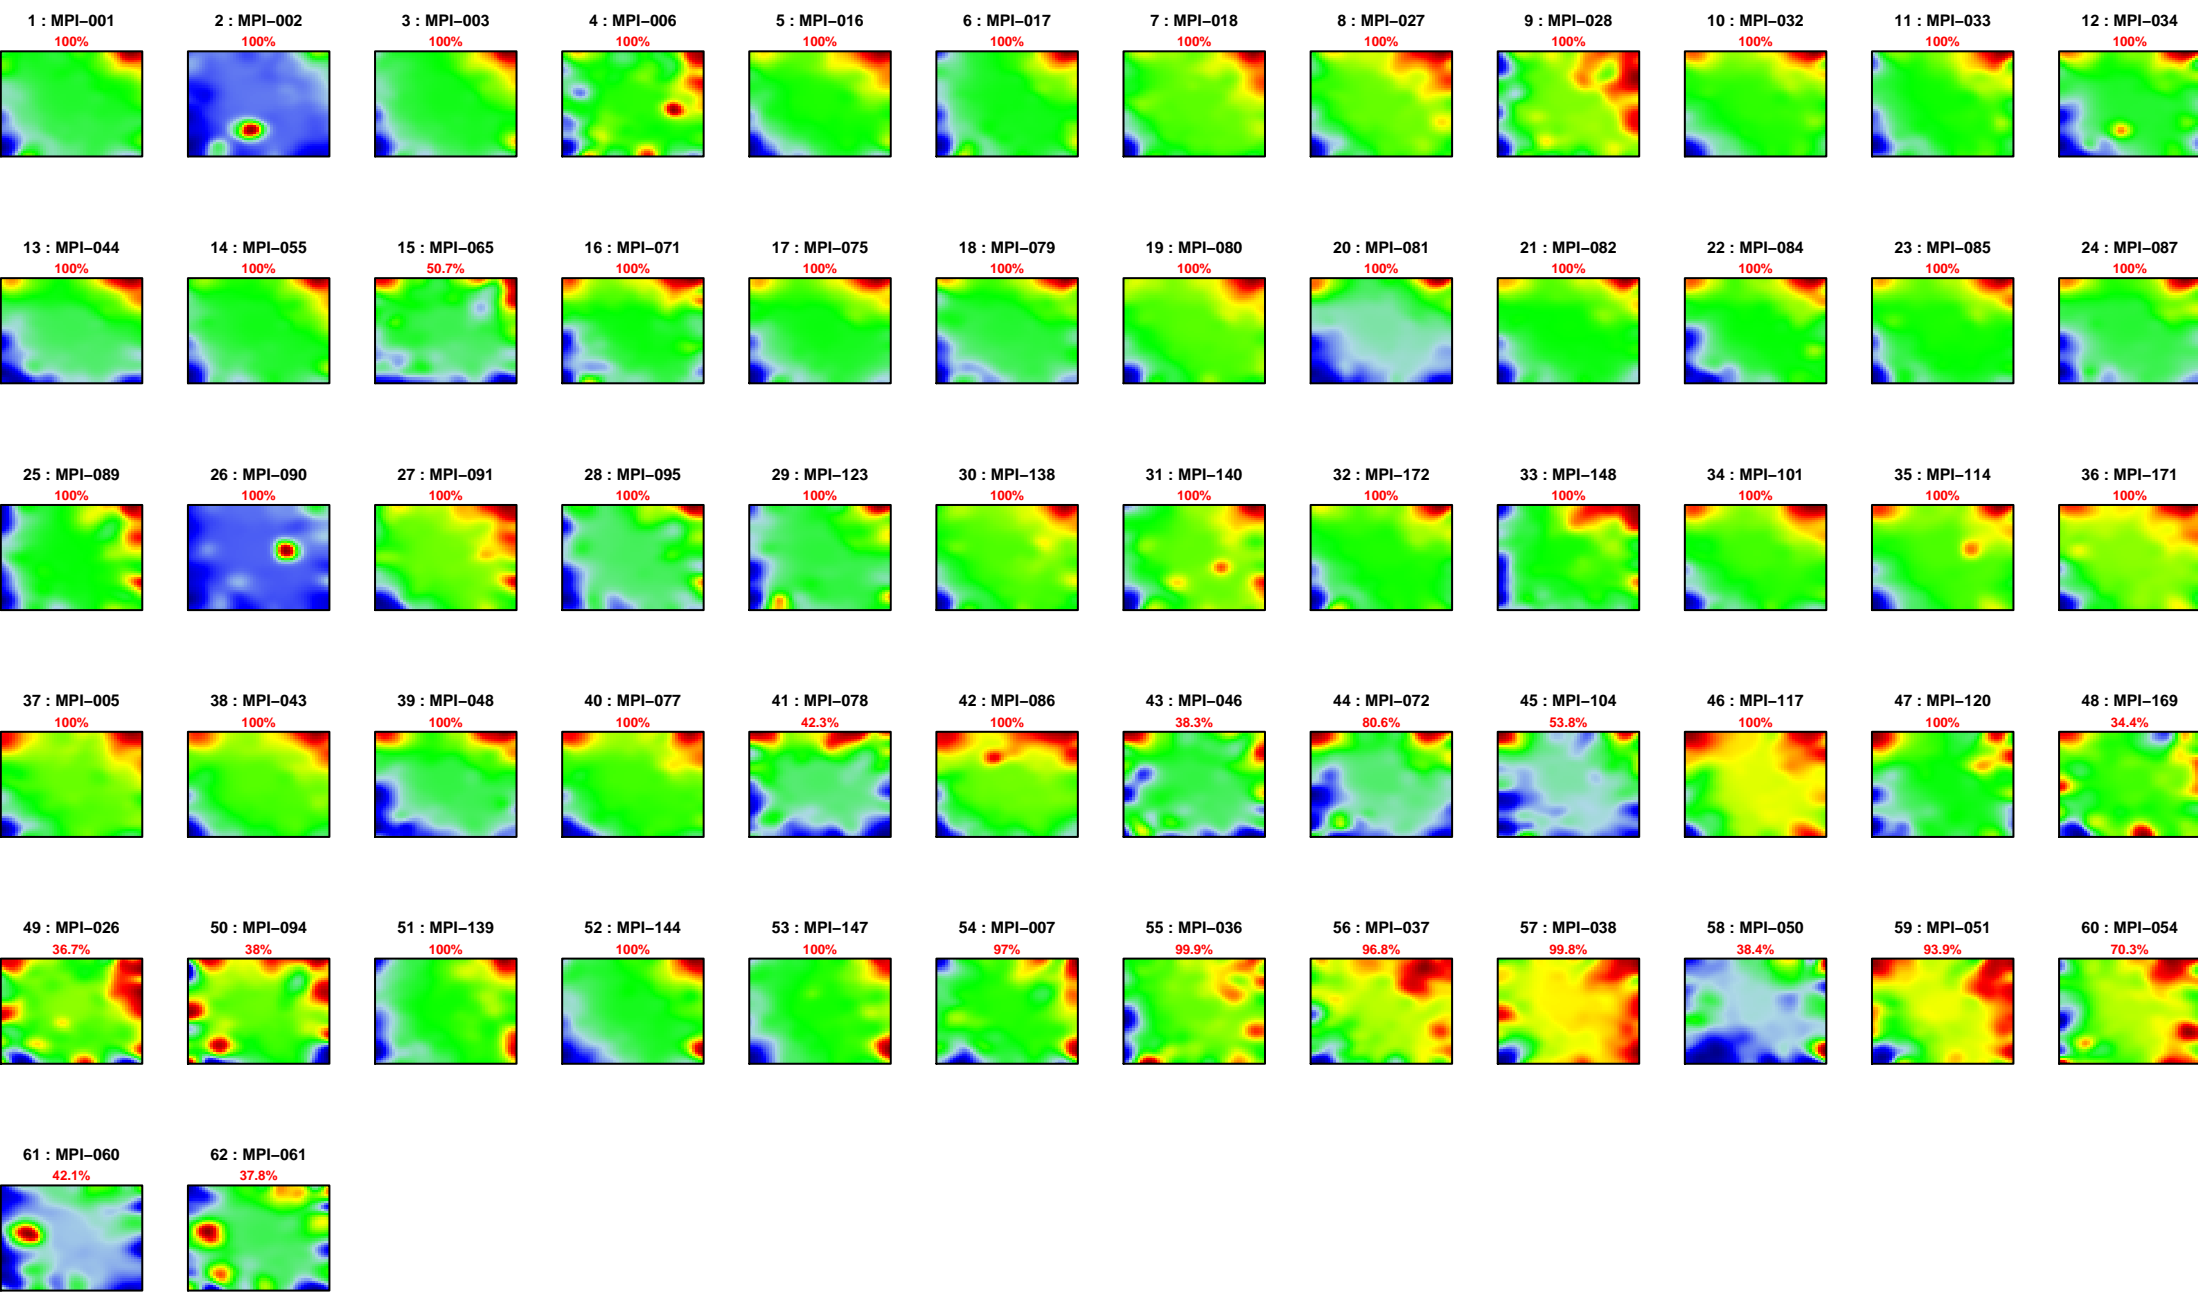

*intermediate A*

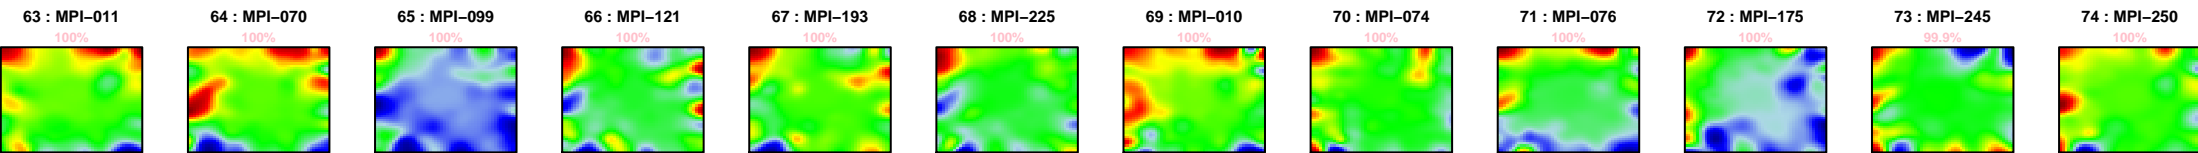

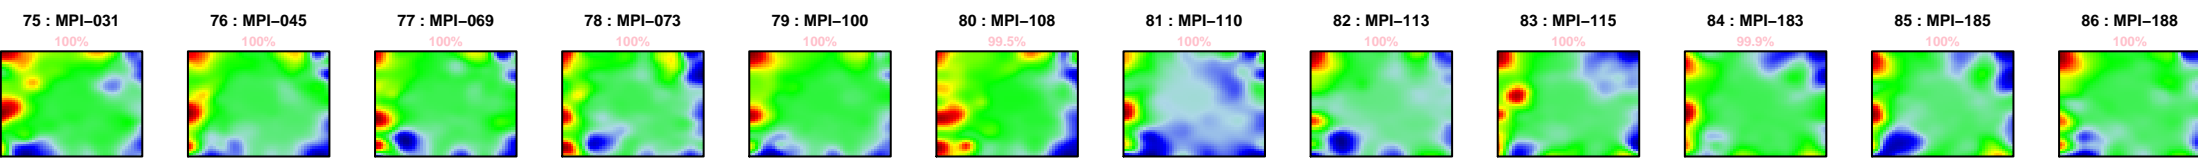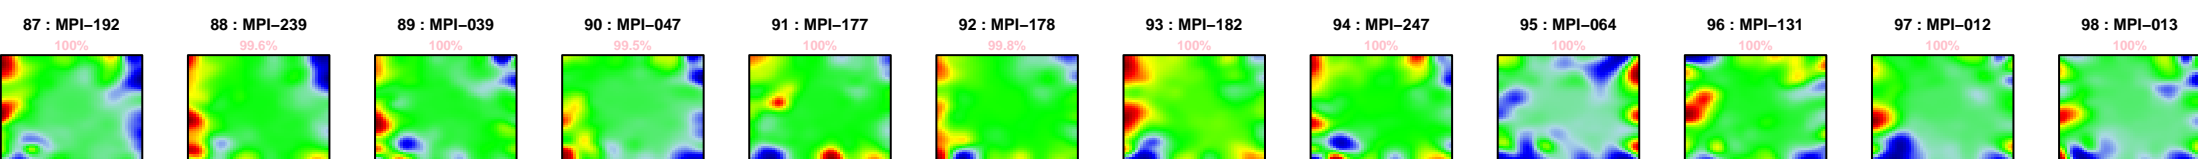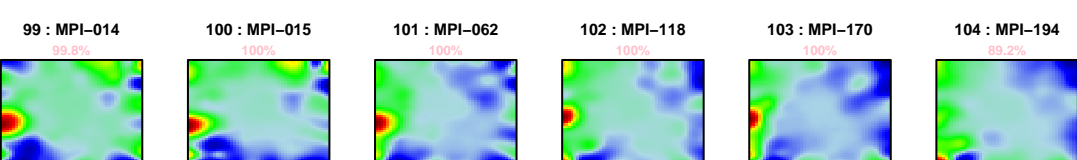

*intermediate B*

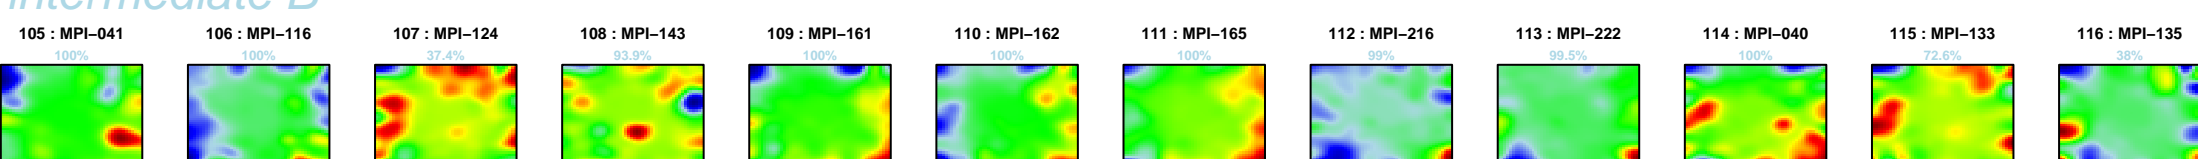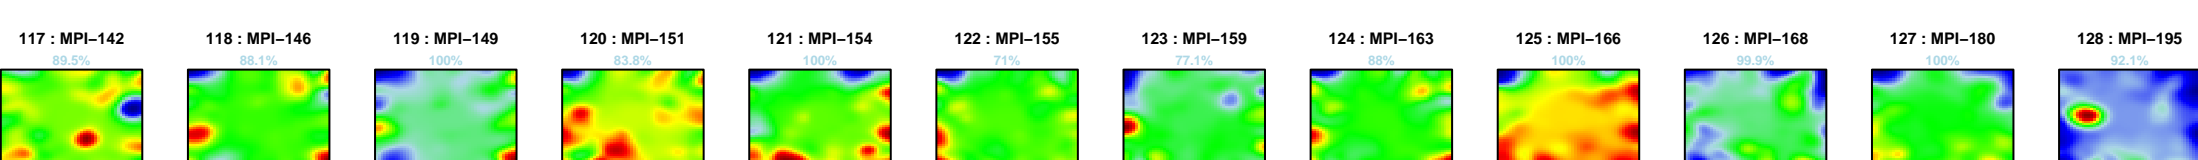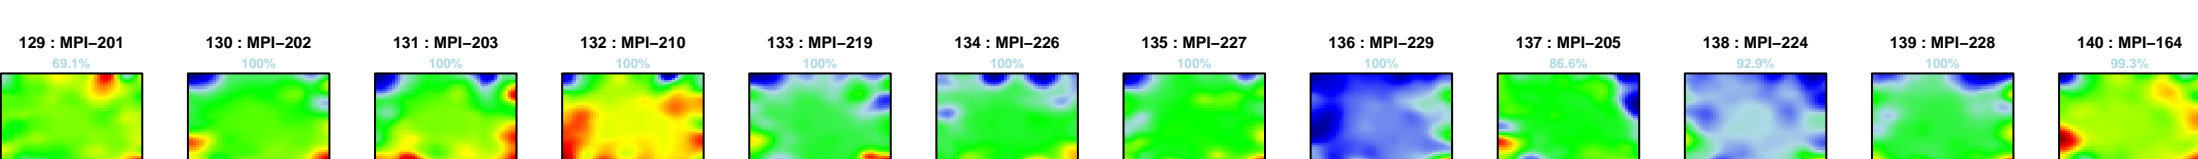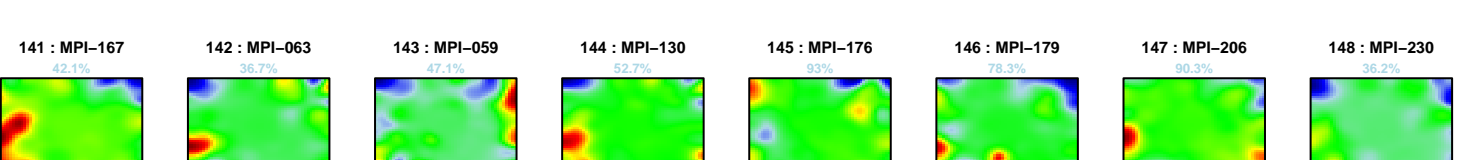

*non-mBL\**

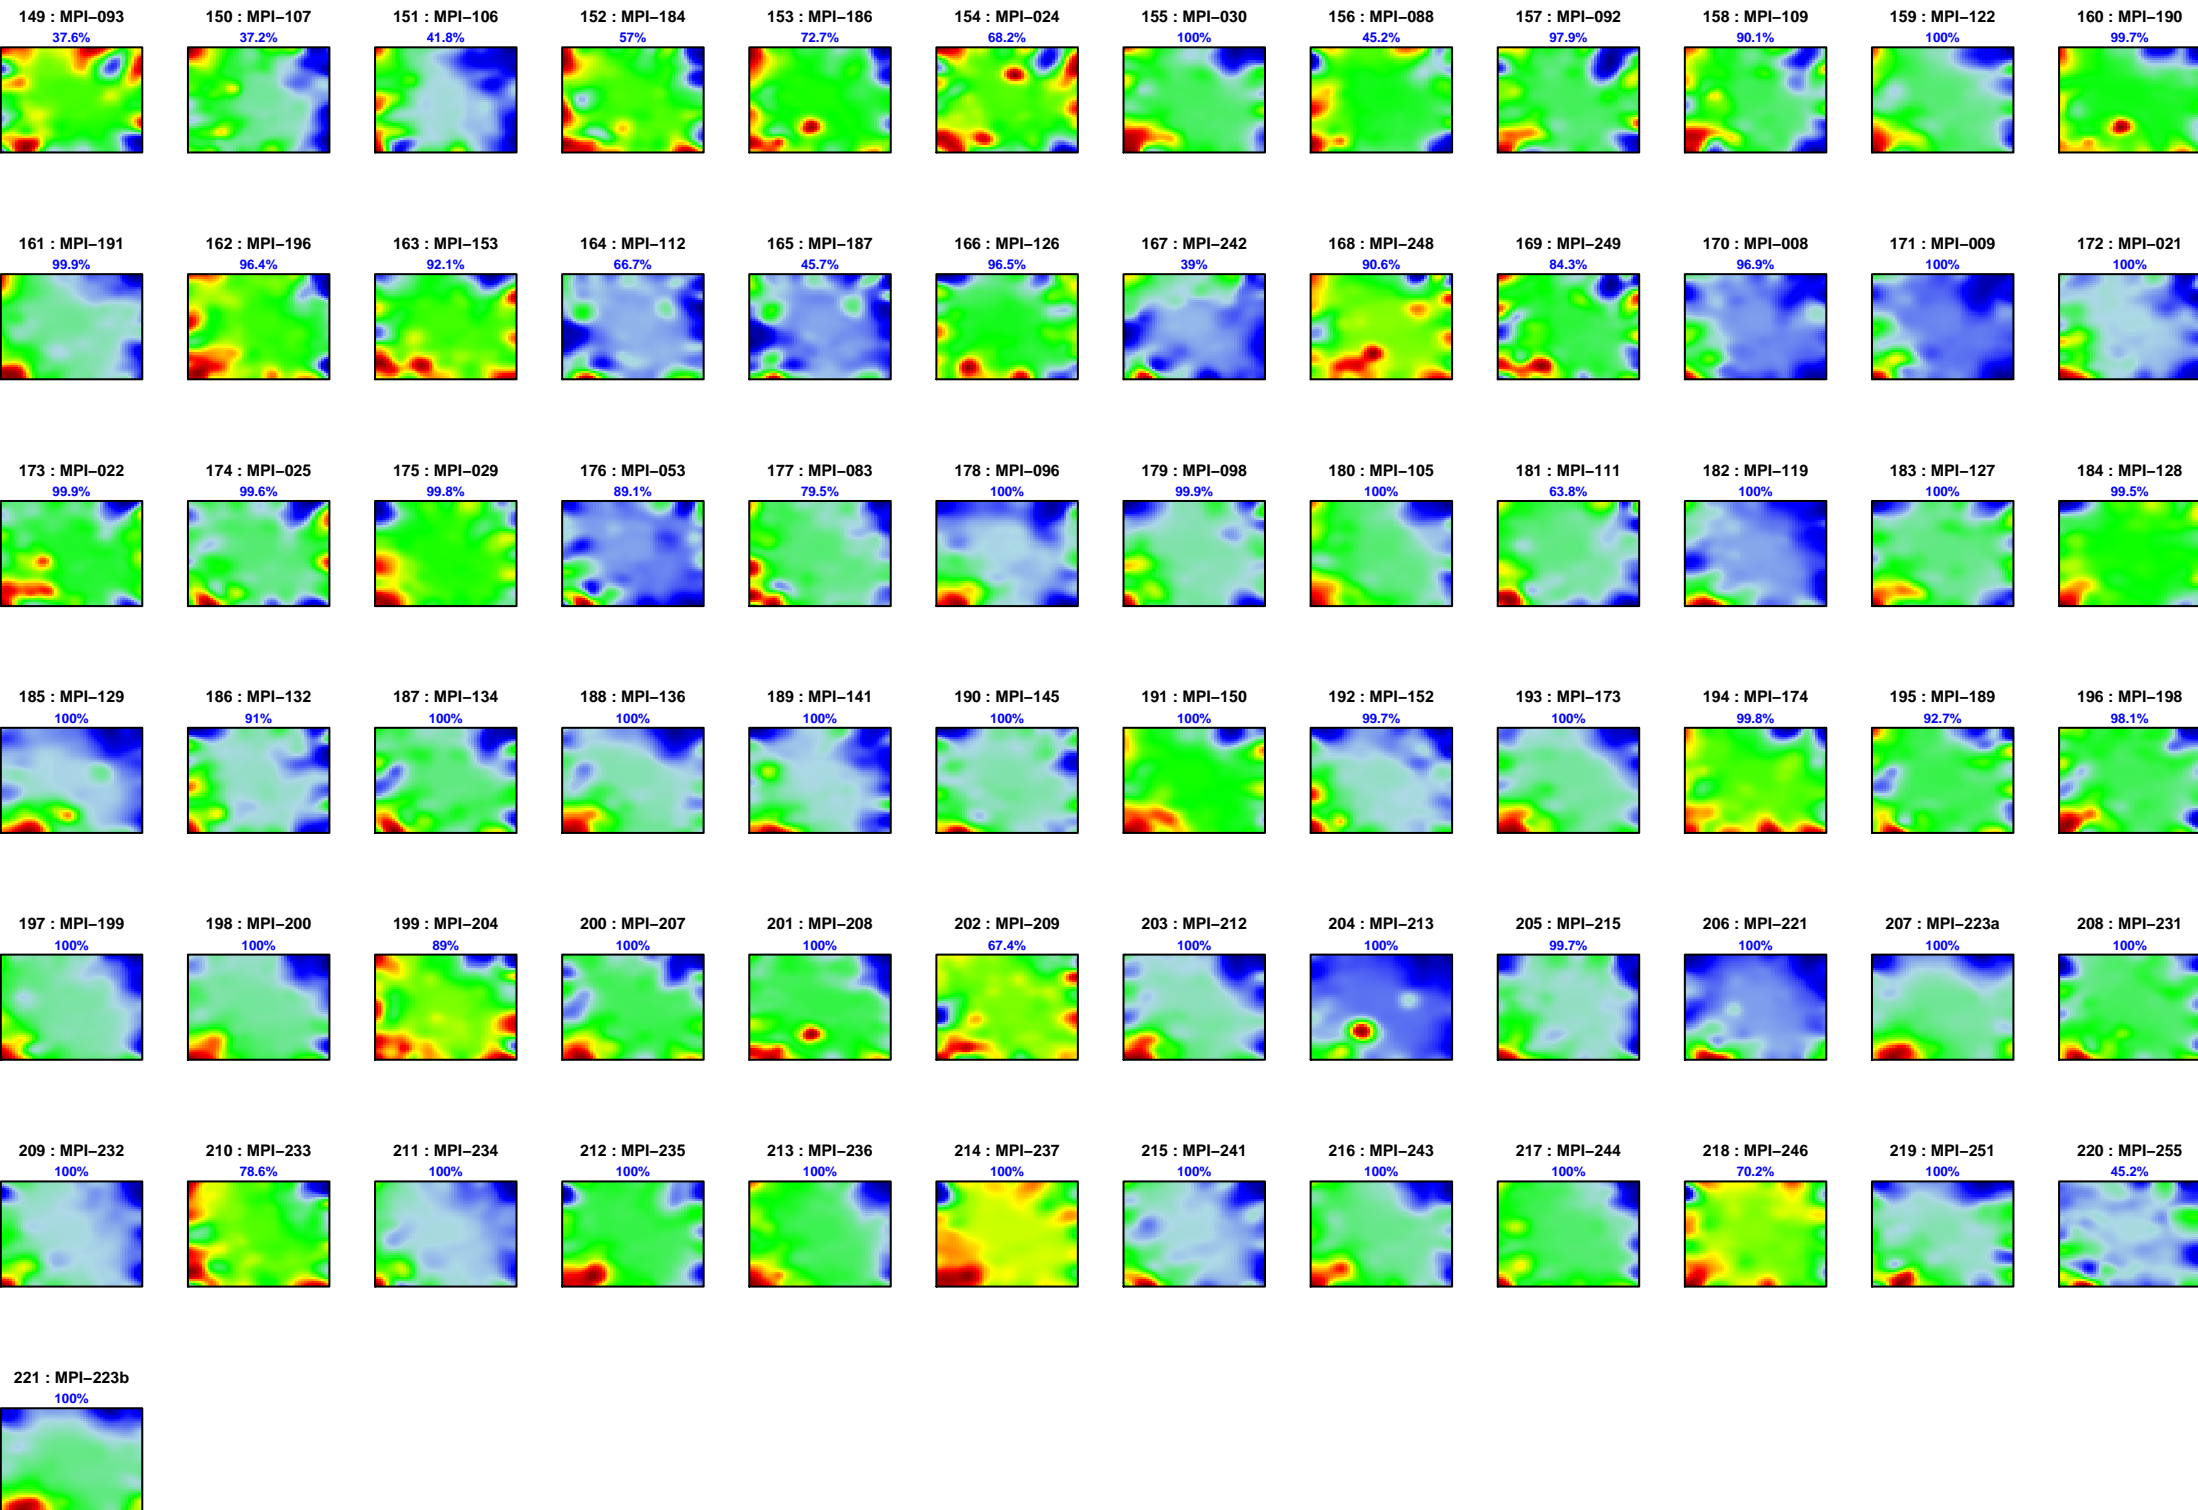

Supplement: s1 [file s1]
